# Supplementary material
Source: PubMed Central journal article supplement (PMC2966112)

Figure 8

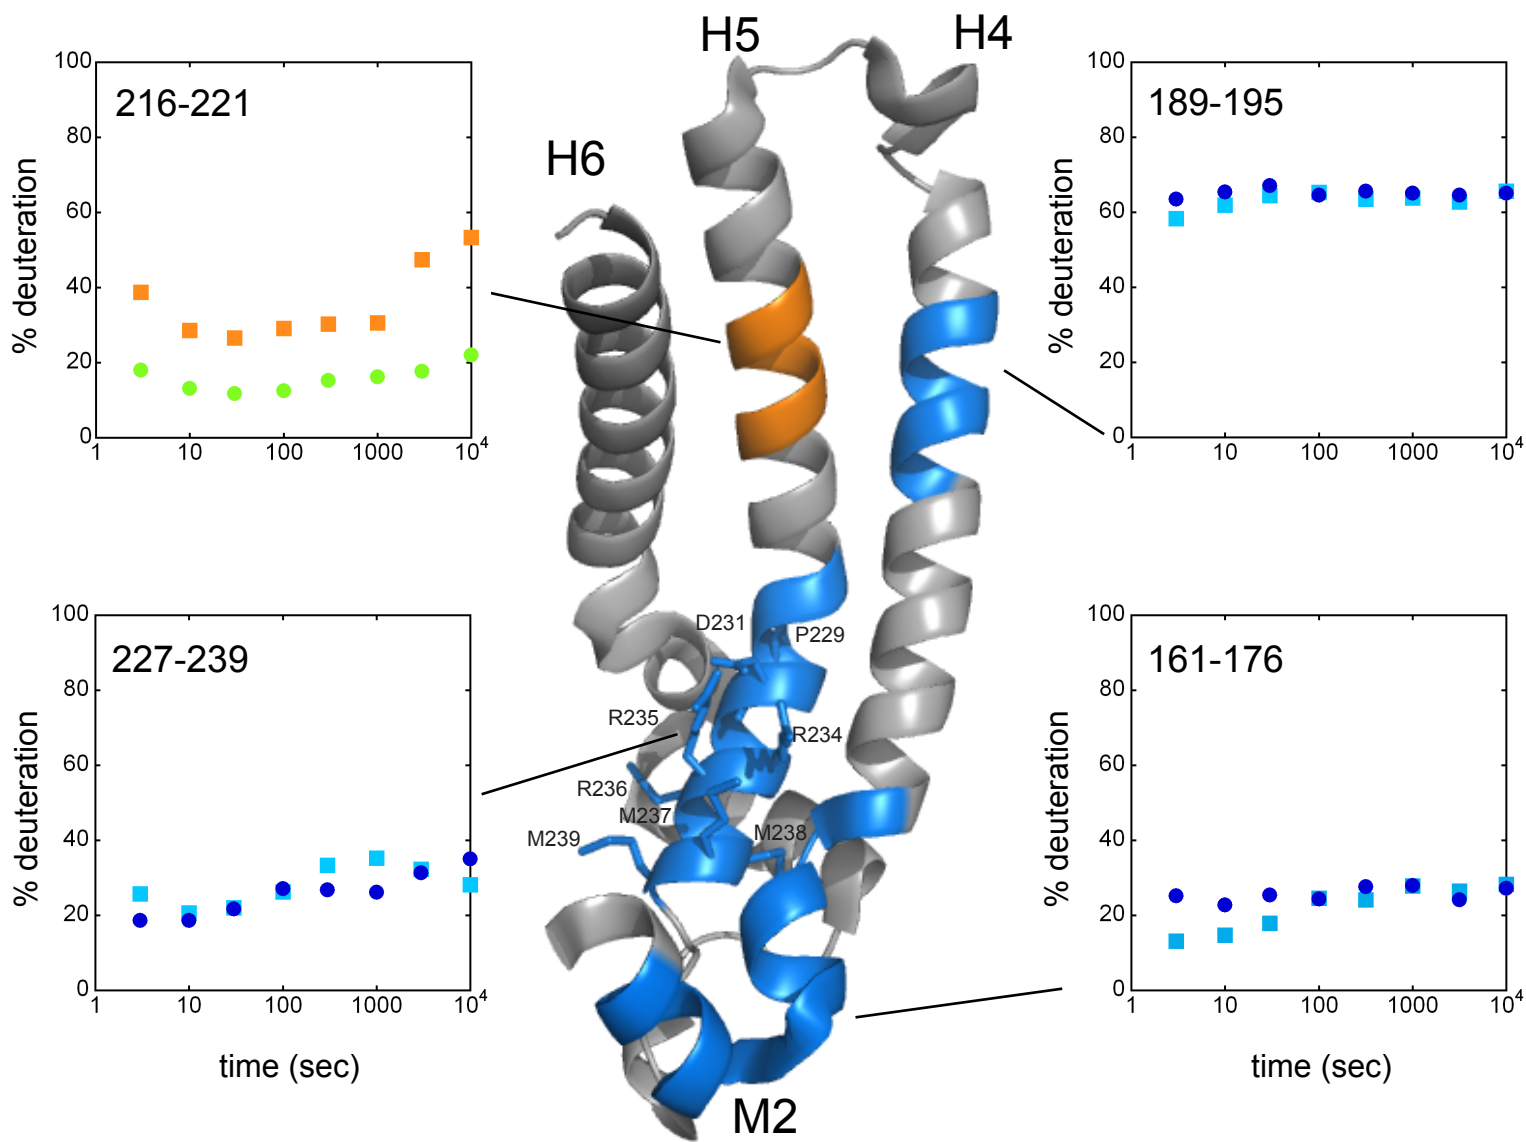

Supplement: supp_M110.146209_Figure_8.pdf [file supp_M110.146209_Figure_8.pdf]
